# Supplementary material for: Identification of Novel Bile Salt-Tolerant Genes in Lactobacillus Using Comparative Genomics and Its Application in the Rapid Screening of Tolerant Strains
Source: MDPI journal article supplement (doi:10.3390/microorganisms10122371), 2022-11-30
Supplement: s1 [file s1]

Table S1. Detailed information of 107 *Lactobacilli*.

| Strains                         | Growth Rate%<br>(Mean±SEM) | Origin      | Size (Mb) | GC%   | Accession No. |
|---------------------------------|----------------------------|-------------|-----------|-------|---------------|
| <i>L. fermentum</i> NT522       | 26.33±0.38                 | Human Feces | 1.93      | 52.20 | SRR21639374   |
| <i>L. fermentum</i> 1610        | 38.84±0.75                 | Human Feces | 1.97      | 52.26 | SRR12560020   |
| <i>L. fermentum</i> NT272       | 40.59±1.23                 | Human Feces | 1.99      | 52.26 | SRR12559831   |
| <i>L. fermentum</i> FJSWX183    | 18.30±0.18                 | Human Feces | 1.99      | 52.10 | SRR12559549   |
| <i>L. fermentum</i> 156         | 77.40±1.91                 | Human Feces | 1.86      | 52.41 | SRR12560021   |
| <i>L. fermentum</i> FSH95       | 27.14±1.24                 | Human Feces | 2.09      | 51.66 | SRR12560122   |
| <i>L. fermentum</i> FJSWX11     | 57.55±1.14                 | Human Feces | 1.93      | 52.27 | SRR12559785   |
| <i>L. fermentum</i> FSDLZ21M1   | 61.01±3.20                 | Human Feces | 1.98      | 52.11 | SRR12559526   |
| <i>L. fermentum</i> FSH171      | 34.46±0.60                 | Human Feces | 2.06      | 51.85 | SRR12559693   |
| <i>L. fermentum</i> FSH43       | 46.41±2.28                 | Human Feces | 1.95      | 52.34 | SRR12560125   |
| <i>L. fermentum</i> FJSWX61     | 36.24±0.08                 | Human Feces | 1.97      | 52.13 | SRR12559774   |
| <i>L. fermentum</i> FBJSY74     | 25.48±1.05                 | Human Feces | 1.93      | 52.17 | SRR12559874   |
| <i>L. fermentum</i> NT652       | 39.65±1.51                 | Human Feces | 2.15      | 51.62 | SRR12559826   |
| <i>L. fermentum</i> FYNDL54     | 36.74±1.28                 | Human Feces | 1.96      | 52.30 | SRR12559673   |
| <i>L. fermentum</i> FJSWX91     | 50.81±2.35                 | Human Feces | 2.01      | 51.94 | SRR12559763   |
| <i>L. fermentum</i> FJSWX121    | 39.51±6.41                 | Human Feces | 1.97      | 51.99 | SRR12559553   |
| <i>L. fermentum</i> FBJSY204    | 37.37±1.50                 | Human Feces | 2.03      | 51.93 | SRR12559863   |
| <i>L. fermentum</i> FBJSY314    | 2.28±0.07                  | Human Feces | 2.04      | 51.88 | SRR12559463   |
| <i>L. fermentum</i> FZJTZ671    | 22.89±1.28                 | Human Feces | 2.01      | 51.92 | SRR12559660   |
| <i>L. fermentum</i> FJSWX213    | 39.67±2.28                 | Human Feces | 1.92      | 52.29 | SRR12559548   |
| <i>L. fermentum</i> FYNDL9L6    | 69.64±2.51                 | Human Feces | 1.93      | 52.24 | SRR12559670   |
| <i>L. fermentum</i> FJXSRPY11L1 | 30.16±1.77                 | Human Feces | 2.05      | 51.86 | SRR12559544   |
| <i>L. fermentum</i> FSH101      | 1.61±0.06                  | Human Feces | 2.06      | 51.93 | SRR12559990   |
| <i>L. fermentum</i> FJSWX141    | 59.44±2.37                 | Human Feces | 1.96      | 52.21 | SRR12559552   |
| <i>L. fermentum</i> FCQ6L1      | 53.99±2.22                 | Human Feces | 2.01      | 51.93 | SRR12559742   |
| <i>L. fermentum</i> FJXSRPY201  | 18.31±0.20                 | Human Feces | 2.02      | 51.92 | SRR12559541   |
| <i>L. fermentum</i> FSCDJY381   | 30.45±1.56                 | Human Feces | 1.96      | 52.31 | SRR12559530   |
| <i>L. fermentum</i> FQHYN18L1   | 32.63±0.11                 | Human Feces | 1.94      | 52.14 | SRR12559535   |
| <i>L. fermentum</i> FFJ12       | 53.22±3.91                 | Human Feces | 1.97      | 52.13 | SRR12559984   |
| <i>L. fermentum</i> FBJSY361    | 4.53±0.13                  | Human Feces | 1.95      | 52.29 | SRR12559753   |
| <i>L. fermentum</i> FJSYC74     | 14.85±0.69                 | Human Feces | 2.00      | 52.05 | SRR12559546   |
| <i>L. fermentum</i> FBJSY241    | 15.22±0.70                 | Human Feces | 1.98      | 52.08 | SRR12559475   |
| <i>L. fermentum</i> FFJ16       | 14.62±1.20                 | Human Feces | 2.00      | 51.97 | SRR12559973   |
| <i>L. fermentum</i> FJXSRPY19L2 | 24.66±0.26                 | Human Feces | 1.97      | 52.03 | SRR12559542   |
| <i>L. fermentum</i> FJXSRPY12L1 | 28.47±1.60                 | Human Feces | 1.97      | 52.18 | SRR12559543   |
| <i>L. fermentum</i> FHuNHMY30L1 | 49.75±0.30                 | Human Feces | 1.99      | 51.92 | SRR12559494   |
| <i>L. fermentum</i> FQHYN16L1   | 27.90±0.71                 | Human Feces | 1.93      | 52.17 | SRR12559536   |
| <i>L. fermentum</i> FCQ7L1      | 38.36±1.61                 | Human Feces | 2.03      | 51.99 | SRR12559731   |
| <i>L. fermentum</i> FBJSY211    | 24.41±0.71                 | Human Feces | 1.94      | 52.03 | SRR12559486   |
| <i>L. fermentum</i> FJSWX252    | 22.4±1.75                  | Human Feces | 2.02      | 51.89 | SRR12559547   |
| <i>L. fermentum</i> FFJND19L1   | 26.53±0.57                 | Human Feces | 1.96      | 52.01 | SRR12560042   |

|                                 |            |             |      |       |             |
|---------------------------------|------------|-------------|------|-------|-------------|
| <i>L. fermentum</i> FNMHLBE23L2 | 31.53±0.46 | Human Feces | 1.97 | 52.11 | SRR12559540 |
| <i>L. fermentum</i> FSDLZ22M13  | 36.95±1.25 | Human Feces | 1.95 | 52.21 | SRR12559525 |
| <i>L. fermentum</i> FSH65       | 29.71±1.58 | Human Feces | 2.04 | 51.79 | SRR12560123 |
| <i>L. fermentum</i> FSCPS241    | 74.70±2.75 | Human Feces | 1.89 | 52.28 | SRR12559529 |
| <i>L. plantarum</i> 14          | 35.77±0.79 | Vegetables  | 3.10 | 44.73 | SRR21639373 |
| <i>L. plantarum</i> 7           | 29.87±1.06 | Vegetables  | 5.61 | 46.79 | SRR21639362 |
| <i>L. plantarum</i> DP19        | 30.49±1.94 | Dairy       | 3.30 | 44.51 | SRR21639352 |
| <i>L. plantarum</i> 59          | 46.19±1.85 | Vegetables  | 5.19 | 47.39 | SRR21639351 |
| <i>L. plantarum</i> VCQBB3125L8 | 53.78±2.03 | Vegetables  | 3.35 | 44.38 | SRR12559741 |
| <i>L. plantarum</i> QS612       | 42.46±1.34 | Vegetables  | 3.35 | 44.37 | SRR21639350 |
| <i>L. plantarum</i> RS417       | 15.20±1.85 | Vegetables  | 6.27 | 45.93 | SRR21639349 |
| <i>L. plantarum</i> RS153       | 34.18±1.29 | Vegetables  | 3.78 | 46.08 | SRR21639348 |
| <i>L. plantarum</i> X12         | 93.27±0.76 | Vegetables  | 3.34 | 44.34 | SRR21639347 |
| <i>L. plantarum</i> JSNJP4G1    | 95.62±0.44 | Human Feces | 3.23 | 44.53 | SRR12559477 |
| <i>L. plantarum</i> FFJNDD7M7   | 93.99±1.21 | Human Feces | 3.23 | 44.53 | SRR12559872 |
| <i>L. plantarum</i> NMT1M1      | 95.56±0.55 | Vegetables  | 3.30 | 44.43 | SRR21639346 |
| <i>L. plantarum</i> QS61        | 55.60±0.30 | Vegetables  | 3.35 | 44.15 | SRR12559707 |
| <i>L. plantarum</i> S83         | 97.61±0.59 | Vegetables  | 3.24 | 44.54 | SRR12559465 |
| <i>L. plantarum</i> CCFM164     | 93.53±1.32 | Human Feces | 3.26 | 44.49 | SRR21639372 |
| <i>L. plantarum</i> CCFM200     | 52.92±2.19 | Human Feces | 3.38 | 44.39 | SRR21639371 |
| <i>L. plantarum</i> CCFM239     | 97.45±0.49 | Human Feces | 3.13 | 44.66 | SRR21639370 |
| <i>L. plantarum</i> CCFM242     | 94.03±0.90 | Human Feces | 3.30 | 44.47 | SRR21639369 |
| <i>L. plantarum</i> CCFM430     | 64.16±1.98 | Human Feces | 3.27 | 44.47 | SRR21639368 |
| <i>L. plantarum</i> CCFM438     | 85.34±1.86 | Human Feces | 3.17 | 44.64 | SRR21639367 |
| <i>L. plantarum</i> CCFM591     | 38.17±0.39 | Human Feces | 3.42 | 44.25 | SRR21639366 |
| <i>L. plantarum</i> CCFM737     | 96.18±0.61 | Human Feces | 3.26 | 44.49 | SRR21639365 |
| <i>L. plantarum</i> CCFM738     | 91.34±0.72 | Human Feces | 3.23 | 44.52 | SRR21639364 |
| <i>L. plantarum</i> CCFM1050    | 30.17±0.66 | Dairy       | 3.39 | 44.28 | SRR21639363 |
| <i>L. plantarum</i> RS4         | 97.03±0.67 | Vegetables  | 3.26 | 44.49 | SRR21639361 |
| <i>L. plantarum</i> CCFM1019    | 89.29±3.13 | Vegetables  | 3.35 | 44.39 | SRR21639360 |
| <i>L. plantarum</i> CCFM1022    | 65.73±2.21 | Vegetables  | 3.40 | 44.31 | SRR21639359 |
| <i>L. plantarum</i> X8          | 95.63±1.05 | Vegetables  | 3.38 | 44.39 | SRR21639358 |
| <i>L. plantarum</i> WCSF1       | 78.28±1.91 | Oral        | 3.31 | 44.45 | SRR8349598  |
| <i>L. paracasei</i> CCFM1089    | 28.39±0.77 | Vegetables  | 3.03 | 46.20 | SRR12559706 |
| <i>L. paracasei</i> CCFM1088    | 27.53±1.39 | Dairy       | 3.15 | 46.15 | SRR21639357 |
| <i>L. paracasei</i> CCFM1120    | 13.21±1.23 | Vegetables  | 3.07 | 46.31 | SRR12559952 |
| <i>L. paracasei</i> CCFM1059    | 8.77±1.03  | Dairy       | 2.98 | 46.21 | SRR21639356 |
| <i>L. paracasei</i> HN131       | 24.22±1.04 | Human Feces | 3.01 | 46.39 | SRR12560097 |
| <i>L. paracasei</i> NT721       | 29.67±0.16 | Human Feces | 3.08 | 46.21 | SRR12560091 |
| <i>L. paracasei</i> FJSSZ4L8    | 27.93±2.41 | Human Feces | 2.98 | 46.32 | SRR12559818 |
| <i>L. paracasei</i> CCFM1157    | 32.18±1.17 | Vegetables  | 3.08 | 46.30 | SRR12559951 |
| <i>L. paracasei</i> CCFM1073    | 30.55±0.62 | Human Feces | 3.05 | 46.24 | SRR12560096 |
| <i>L. paracasei</i> VGZTR132M3  | 29.78±3.22 | Vegetables  | 3.06 | 46.35 | SRR21639355 |
| <i>L. paracasei</i> FJSCZD2L3   | 30.60±1.60 | Human Feces | 3.07 | 46.36 | SRR12559820 |

|                                 |            |             |      |       |             |
|---------------------------------|------------|-------------|------|-------|-------------|
| <i>L. paracasei</i> FFJNDD7M6   | 34.23±2.83 | Human Feces | 2.84 | 46.37 | SRR12559700 |
| <i>L. paracasei</i> DP11        | 26.50±0.67 | Dairy       | 3.02 | 46.28 | SRR12559701 |
| <i>L. paracasei</i> CQYY18      | 27.50±1.85 | Vegetables  | 3.20 | 46.14 | SRR12559703 |
| <i>L. paracasei</i> CQBS21      | 21.85±1.85 | Vegetables  | 3.10 | 46.30 | SRR12559704 |
| <i>L. paracasei</i> 15M11       | 16.07±0.50 | Vegetables  | 2.74 | 46.54 | SRR21639354 |
| <i>L. paracasei</i> M207F01L611 | 25.80±0.60 | Dairy       | 3.06 | 46.19 | SRR12560093 |
| <i>L. paracasei</i> M206F01L423 | 14.15±0.33 | Dairy       | 2.77 | 46.49 | SRR12560095 |
| <i>L. paracasei</i> RS5310      | 8.78±0.58  | Vegetables  | 3.18 | 46.19 | SRR12559950 |
| <i>L. paracasei</i> FCQHC12L3   | 31.34±3.46 | Human Feces | 3.06 | 46.16 | SRR12559980 |
| <i>L. paracasei</i> FQHYN84L6   | 9.58±0.62  | Human Feces | 3.00 | 46.31 | SRR12559805 |
| <i>L. paracasei</i> FSDLZ36M1   | 20.96±2.22 | Human Feces | 2.98 | 46.30 | SRR12560118 |
| <i>L. paracasei</i> NT521       | 22.20±1.67 | Human Feces | 2.97 | 46.28 | SRR12560092 |
| <i>L. paracasei</i> NT752       | 24.07±1.19 | Human Feces | 3.07 | 46.25 | SRR12560090 |
| <i>L. paracasei</i> FBJHD50L1   | 18.32±1.25 | Human Feces | 3.13 | 46.19 | SRR12559988 |
| <i>L. paracasei</i> FXJCJ22M1   | 33.24±1.18 | Human Feces | 3.38 | 45.98 | SRR12560113 |
| <i>L. paracasei</i> FNMGWLCB1L2 | 17.93±1.11 | Human Feces | 3.00 | 46.42 | SRR12559816 |
| <i>L. paracasei</i> FBJSY11L4   | 26.40±0.88 | Human Feces | 2.99 | 46.26 | SRR12559986 |
| <i>L. paracasei</i> C57BLB45    | 21.13±1.40 | Mice Feces  | 3.10 | 46.30 | SRR21639353 |
| <i>L. paracasei</i> 17005       | 15.66±1.35 | Vegetables  | 3.21 | 46.27 | SRR12559705 |
| <i>L. paracasei</i> FQHYN85L3   | 17.16±0.60 | Human Feces | 2.96 | 46.26 | SRR12559804 |
| <i>L. paracasei</i> VCQWX5L7    | 28.37±0.49 | Vegetables  | 3.16 | 46.26 | SRR12559945 |
| <i>L. paracasei</i> FQHYN79L1   | 14.40±1.44 | Human Feces | 2.95 | 46.27 | SRR12559807 |

Table S2. Primer sequences.

| Genes        | Primer       | Sequences (5'-3')          |
|--------------|--------------|----------------------------|
| reference    | 16S rRNA-F   | TCCTACGGGAGGCAGCAGT        |
|              | 16S rRNA-R   | GGACTACCAGGGTATCTAATCCTGTT |
| <i>waaB</i>  | LF156_0369-F | TGGAACGGTGGGACAGA          |
|              | LF156_0369-R | CCAAAGCCGATTAGCAGG         |
| <i>citXG</i> | LF156_1138-F | CCATTTTTTCGCTGGGTAT        |
|              | LF156_1138-R | CGGTCAGGGTTTGTCTTG         |
| <i>citF</i>  | LF156_1139-F | GACTACCCGAACACCCAG         |
|              | LF156_1139-R | AAGCGAGTTGCCCACTAC         |
| <i>citE</i>  | LF156_1140-F | TAGCATCGCCGCTTCG           |
|              | LF156_1140-R | ATGTGTTCCGTTTCCCG          |
| <i>citD</i>  | LF156_1141-F | CAAAATGGCATCAAATC          |
|              | LF156_1141-R | AAGCACCTTATCAACGG          |
| <i>citC</i>  | LF156_1142-F | TATGAACGCCAACCCCTT         |
|              | LF156_1142-R | GGATAGATCGCTGACCCC         |
| <i>sfcA</i>  | LF156_1144-F | AGCCAATACCCGAACCA          |
|              | LF156_1144-R | ACCAAGGAGGCCAGTCC          |
| <i>pstA</i>  | LF156_1200-F | CGTGACTAAGGTGATTCGGT       |
|              | LF156_1200-R | GCAGTTTCTGGTTAAGAGCG       |
| <i>pstC</i>  | LF156_1201-F | GCCACTCTGACTTCGATTTTA      |

|             |              |                         |
|-------------|--------------|-------------------------|
|             | LF156_1201-R | GTTGTTCTACCCCTTCTTGT    |
| <i>pstS</i> | LF156_1202-F | CCGACCACAAGTCAGTTT      |
|             | LF156_1202-R | GCTTTTtagCGTCAATCC      |
| <i>mtlR</i> | LF156_1574-F | TTAGCAACATCAAGCACG      |
|             | LF156_1574-R | TTCAAATAAGTCACGGGT      |
| <i>ulaA</i> | LF156_1571-F | GTTACTTACCATTACGCC      |
|             | LF156_1571-R | CTTGTTACCAAACCACTT      |
| <i>ulaB</i> | LF156_1572-F | ATGGAGGAACAAACAATGAAG   |
|             | LF156_1572-R | TGGGTCCAAGAAGAAGTAATC   |
| <i>ulaC</i> | LF156_1573-F | ATTGTCCTGAAATTGCAC      |
|             | LF156_1573-R | AGATTGACGTCTTGGTTGG     |
| <i>rpmG</i> | LF156_1608-F | AACAAGGCCAACACCCC       |
|             | LF156_1608-R | TCAACGAACCACACCCG       |
| <i>rpmF</i> | LF156_1609-F | ACACCCTACCCACCCAC       |
|             | LF156_1609-R | TTACTTCACGGAACGCC       |
| <i>ldhA</i> | LF156_1288-F | ATGGAGATGGTGCCCT        |
|             | LF156_1288-R | ATCGTGATCCCCTTTTG       |
| <i>lplB</i> | LPS83_2507-F | TAGGGGTTTGAAAGGAA       |
|             | LPS83_2507-R | AACTGGTAGGATGTGTGG      |
| <i>lplC</i> | LPS83_2506-F | TGTTGGGACCATAATGAACAG   |
|             | LPS83_2506-R | ACAGCATAGAAATCAAAGCGA   |
| <i>lplA</i> | LPS83_2505-F | CGAAGAACTATGACGCAATGA   |
|             | LPS83_2505-R | AACCGCTACCAGAAGTAACCA   |
| <i>msmX</i> | LPS83_2498-F | ATGTTGATTCTCGTGATTTT    |
|             | LPS83_2498-R | TTAGTGCGACTTACCTGTTT    |
| <i>yesM</i> | LPS83_2502-F | CCAGAACTCGCCAATGT       |
|             | LPS83_2502-R | TGGGAATCTCAACCGCA       |
| <i>yesN</i> | LPS83_2501-F | TCAATCACGCCAAAGACG      |
|             | LPS83_2501-R | TGACCCAGATACACCGCA      |
| <i>agrA</i> | LPS83_1168-F | AGTTGGTGGTGCGACA        |
|             | LPS83_1168-R | ACCCGGCCTGAGTTTGT       |
| <i>secB</i> | LPS83_1081-F | GCTGGCGGAGAAGAAAA       |
|             | LPS83_1081-R | GCGACCGAACATAAGGG       |
| <i>bsh</i>  | LPS83_1788-F | TACCTGGAGACTTGTCTCA     |
|             | LPS83_1788-R | ACTTCACATAGCCCTTTTGT    |
| <i>celB</i> | LPS83_0388-F | TTTGGATTGGTGGAGCC       |
|             | LPS83_0388-R | CCATCATCATCGGAACG       |
| <i>bglF</i> | LPS83_1775-F | GGACATGGGTTTATGGG       |
|             | LPS83_1775-R | AGCCTGCTGTTGACGAG       |
| <i>ulaA</i> | LPS83_1792-F | TCACCCTTTGCTTCCATGT     |
|             | LPS83_1792-R | GCTGTTGTTGAGCCGTATT     |
| <i>ulaB</i> | LPS83_1793-F | ATTCAGCAGATTACTTCTTTGTT |
|             | LPS83_1793-R | TCTTGATCCAGAATTGTATTGAC |
| <i>manX</i> | LPS83_2131-F | TTAGTAAAAGAACCCGCTACA   |

|                           |                     |                                                                   |
|---------------------------|---------------------|-------------------------------------------------------------------|
|                           | LPS83_2131-R        | TAAGGCAACAACTTCGTAAC                                              |
| <i>manY</i>               | LPS83_2130-F        | CATTATTGTTGGCTTTGTGCT                                             |
|                           | LPS83_2130-R        | CTTGACTGACCTTTTTGGACT                                             |
| <i>manZ</i>               | LPS83_2129-F        | GTTGGTGATACGCTTGT                                                 |
|                           | LPS83_2129-R        | ACCTAATGGGTTTCCTT                                                 |
| <i>manX</i>               | LPS83_2128-F        | GGCGGGCAGTGTAATCA                                                 |
|                           | LPS83_2128-R        | GCCAACGCTAACGGAAGA                                                |
| <i>kdgK</i>               | LPS83_0382-F        | GGCAGCACTCTATGAACAAT                                              |
|                           | LPS83_0382-R        | CTAAAACCAGCAAACCACTT                                              |
| <i>talA</i>               | LPS83_1791-F        | AGTAGATGGGGTAACAACAA                                              |
|                           | LPS83_1791-R        | GAAACTGAGAATACAAGGGT                                              |
| <i>gdh</i>                | LPS83_3136-F        | CGGTGACCTAGATGTTTGGG                                              |
|                           | LPS83_3136-R        | TATTGCCTGGCTTTTGATGC                                              |
| <i>scrK</i>               | LPS83_2500-F        | TATTGGGGGTTACTCGC                                                 |
|                           | LPS83_2500-R        | ATTGTCCCGCTGAAGGT                                                 |
| <i>malZ</i>               | LPS83_1787-F        | AACGCCACTACCTCAAAAG                                               |
|                           | LPS83_1787-R        | TGAAGACCCGATAACCATC                                               |
| <i>bglA</i>               | LPS83_1777-F        | AATTCTACGAAACTTTCGC                                               |
|                           | LPS83_1777-R        | CTTTTTGTATTAGCACCC                                                |
| <i>pyrC</i>               | LPS83_0385-F        | AATGTTTATGCCTTGCTT                                                |
|                           | LPS83_0385-R        | TACTGATTTACTGACCCG                                                |
| <i>selA</i>               | LPS83_0384-F        | CATTACCCTGGTGTTAG                                                 |
|                           | LPS83_0384-R        | TAGTTCGTGTCGTGCCC                                                 |
| <i>bglA</i>               | LPS83_1774-F        | TAAAGACTTTTTGTGGGGCG                                              |
|                           | LPS83_1774-R        | ATTGACATATGCTTGCGATC                                              |
| <i>LP_1782</i>            | LPS83_1782-F        | GAGATTCCTGGTGACTGG                                                |
|                           | LPS83_1782-R        | GTTCAAATGATGGTGGT                                                 |
| <b>pSIP403-expression</b> |                     |                                                                   |
|                           | pSIP403-Em-F        | ATCGTTTAACTTCAGGAGAGATTACATG                                      |
|                           | pSIP403-Em-R        | CGACTCATAGAATTATTTCTCCCG                                          |
|                           | pSIP403-tra-F       | GCATAATAGTCTTGTAAGGTATTTAGCTGGCTG                                 |
|                           | pSIP403-tra-R       | TTTGAAGCTTGCGCCTTCG                                               |
|                           | pSIP403-F           | CTCGAGGAATTCGGTACCCCG                                             |
|                           | pSIP403-R           | CCATGGGAATCATACTCCTATATATTTTATAAAGCATACTTTACG                     |
|                           | pSIP- <i>bsh</i> -F | TAGGAGTATGATTCCCATGGCAATGTGCACGAGCATCAACGTC                       |
|                           | pSIP- <i>bsh</i> -R | GGGGTACCGAATTCCTCGAGTTAATTTAATTCGACCGGCGCCC                       |
|                           | pSIP-156-1144-F     | TAGGAGTATGATTCCCATGGCAATGCCTGAAAATGAAAACGATGAAGTTTTTC             |
|                           | pSIP-156-1144-R     | GGGGTACCGAATTCCTCGAGTTAGTGTTTTGCTGGGCAAAGTCG                      |
|                           | pSIP-156-1288-F     | TAGGAGTATGATTCCCATGGCAATGTACAGTACCCACGAGCACG                      |
|                           | pSIP-156-1288-R     | GGGGTACCGAATTCCTCGAGTTACTTAACGATGTTTTAGTCCGTTGGCC                 |
|                           | pSIP-156-1574-F     | TAGGAGTATGATTCCCATGGCAATGATTCGCTTTAGCAACATCAAGCAC                 |
|                           | pSIP-156-1574-R     | GGGGTACCGAATTCCTCGAGTTAAGCTAGTTTTGAATCCATTAGAAGTTGGAGAAAC         |
|                           | pSIP-S83-1788-F     | TAGGAGTATGATTCCCATGGCAATGTGTACTGCCATAACTTATCAATCTTATAATAATTACTTCG |
|                           | pSIP-S83-1788-R     | GGGGTACCGAATTCCTCGAGTTAGTTAACTGCATAGTATTGTGCTTCTGATCG             |

|                        |                                                             |
|------------------------|-------------------------------------------------------------|
| pSIP-S83-2665-F        | TAGGAGTATGATTCCCATGGCAATGTGTACTAGTTTAACGATTCAAACCACGG       |
| pSIP-S83-2665-R        | GGGGTACCGAATTCCTCGAGTTAGTTTGCTAACCGGAAGTGTGGG               |
| pSIP-S83-3136-F        | TAGGAGTATGATTCCCATGGCAATGTATGAAGATTAAATGGTAAGGTAGCAGTCATTAC |
| pSIP-S83-3136-R        | GGGGTACCGAATTCCTCGAGTTATCCTTGACCATCCTTAAATGCAGGATAAAG       |
| <b>Rapid screening</b> |                                                             |
| <i>sfcA</i> -F         | AGCCTGAAAATGAAAACGATGAAGTTTTTC                              |
| <i>sfcA</i> -R         | TTAGTGTTTTTGCTGGCAAAGTCG                                    |

Table S3. Functional genes and redundant genes in *Lactobacillus* based on comparative genomic analysis

| Species             | Group            | Genes                    | Functions                                                                    | Pathways                  |
|---------------------|------------------|--------------------------|------------------------------------------------------------------------------|---------------------------|
| <i>L. fermentum</i> | Functional genes | LF_1137                  | hydrolase acyltransferase                                                    | Two-Component System      |
|                     |                  | LF_1152                  | glycosyl transferase                                                         |                           |
|                     |                  | LF_0674                  | oxidoreductase                                                               |                           |
|                     |                  | LF_0676                  | 2,5-diketo-D-gluconic acid reductase                                         |                           |
|                     |                  | LF_1145                  | citrate lyase                                                                |                           |
|                     |                  | LF_0369 ( <i>waaB</i> )  | UDP-D-galactose:(glucosyl) LPS alpha-1,6-D-galactosyltransferase             |                           |
|                     |                  | LF_1138 ( <i>citXG</i> ) | triphosphoribosyl-dephospho-CoA synthase                                     |                           |
|                     |                  | LF_1139 ( <i>citF</i> )  | citrate lyase subunit alpha                                                  |                           |
|                     |                  | LF_1140 ( <i>citE</i> )  | citrate (pro-3S)-lyase subunit beta                                          |                           |
|                     |                  | LF_1141 ( <i>citD</i> )  | citrate lyase acyl carrier protein                                           |                           |
|                     |                  | LF_1142 ( <i>citC</i> )  | (citrate (pro-3S)-lyase ligase                                               |                           |
|                     |                  | LF_1144 ( <i>sfcA</i> )  | malate dehydrogenase                                                         |                           |
|                     |                  | LF_1200 ( <i>pstA</i> )  | phosphate ABC superfamily ATP binding cassette transporter, membrane protein |                           |
|                     |                  | LF_1201 ( <i>pstC</i> )  | phosphate ABC transporter, permease PstC                                     |                           |
|                     |                  | LF_1202 ( <i>pstS</i> )  | phosphate ABC transporter substrate-binding protein                          |                           |
|                     |                  | LF_1574 ( <i>mtlR</i> )  | mannitol operon transcriptional antiterminator                               |                           |
|                     |                  | LF_1571 ( <i>ulaA</i> )  | PTS ascorbate transporter subunit IIC                                        |                           |
|                     |                  | LF_1572 ( <i>ulaB</i> )  | PTS system lactose cellobiose specific IIB component                         |                           |
|                     |                  | LF_1573 ( <i>ulaC</i> )  | multidomain protein                                                          |                           |
|                     |                  | LF_1608 ( <i>rpmG</i> )  | 50S ribosomal protein L33                                                    |                           |
|                     |                  | LF_1609 ( <i>rpmF</i> )  | 50S ribosomal protein L32                                                    |                           |
|                     |                  | LF_1288 ( <i>ldhA</i> )  | lactate dehydrogenase                                                        |                           |
|                     |                  | LF_1293                  | hypothetical protein                                                         |                           |
|                     |                  | LF_1803                  | hypothetical protein                                                         |                           |
|                     |                  | LF_1830                  | hypothetical protein                                                         |                           |
|                     | Redundant genes  | LF_1828                  | dihydroxy-acid dehydratase                                                   | Phosphotransferase system |
|                     |                  | LF_1829                  | hypothetical protein                                                         |                           |
|                     |                  | LF_1830                  | sodium transporter                                                           |                           |

|                     |                  |         |                                                   |
|---------------------|------------------|---------|---------------------------------------------------|
|                     |                  | LF_1831 | MFS transporter                                   |
|                     |                  | LF_1832 | 3-isopropylmalate dehydrogenase                   |
|                     |                  | LF_1833 | 3-isopropylmalate dehydratase large subunit       |
|                     |                  | LF_1834 | 3-isopropylmalate dehydratase small subunit       |
|                     |                  | LF_1835 | translation factor Sua5                           |
|                     |                  | LF_1836 | membrane protein                                  |
|                     |                  | LF_1837 | hypothetical protein                              |
|                     |                  | LF_1838 | MFS transporter                                   |
|                     |                  | LF_1229 | hypothetical protein                              |
|                     |                  | LF_0712 | membrane protein                                  |
|                     |                  | LF_1917 | MFS transporter                                   |
|                     |                  | LF_1919 | transcriptional regulator                         |
|                     |                  | LF_1920 | uracil phosphoribosyltransferase                  |
|                     |                  | LF_1921 | estradiol 17-beta-dehydrogenase                   |
|                     |                  | LF_1922 | molybdenum ABC transporter ATP-binding protein    |
|                     |                  | LF_1923 | threonine dehydratase                             |
| <i>L. plantarum</i> | Functional genes | LP_1780 | antitermination protein BlgG                      |
|                     |                  | LP_1784 | LacI family transcriptional regulator             |
|                     |                  | LP_2182 | flagellar biosynthetic protein FlhB               |
|                     |                  | LP_1733 | lactose permease                                  |
|                     |                  | LP_2917 | peptidase M10                                     |
|                     |                  | LP_1835 | malate dehydrogenase                              |
|                     |                  | LP_2852 | D-alanyl-D-alanine carboxypeptidase               |
|                     |                  | LP_1789 | hydrolase                                         |
|                     |                  | LP_2822 | DNA-damage-inducible protein J                    |
|                     |                  | LP_2737 | alpha-1 2-mannosidase                             |
|                     |                  | LP_0093 | membrane protein                                  |
|                     |                  | LP_1776 | transcriptional antiterminator                    |
|                     |                  | LP_2875 | site-specific recombinase, phage integrase family |
|                     |                  | LP_1830 | glutamine amidotransferase                        |
|                     |                  | LP_0383 | 2-dehydro-3-deoxyphosphooctonate aldolase         |
|                     |                  | LP_1838 | cell surface protein                              |
|                     |                  | LP_1839 | 2,5-diketo-D-gluconic acid reductase              |
|                     |                  | LP_1840 | NAD(P)-dependent oxidoreductase                   |
|                     |                  | LP_1841 | bile-acid 7-alpha-dehydratase                     |
|                     |                  | LP_1164 | bacteriocin immunity protein                      |
|                     |                  | LP_1166 | bacteriocin immunity protein                      |
|                     |                  | LP_3133 | 2,5-diketo-D-gluconic acid reductase              |
|                     |                  | LP_3134 | DUF1211 domain-containing membrane protein        |
|                     |                  | LP_3138 | oxidoreductase                                    |
|                     |                  | LP_3139 | organophosphate reductase                         |
|                     |                  | LP_2621 | oxidoreductase                                    |
|                     |                  | LP_2620 | oxidoreductase                                    |
|                     |                  | LP_2619 | 2,5-diketo-D-gluconic acid reductase              |

|                         |                                                   |                      |
|-------------------------|---------------------------------------------------|----------------------|
| LP_2617                 | oxidoreductase                                    |                      |
| LP_2430                 | glycosyltransferase                               |                      |
| LP_2508                 | benzene 1,2-dioxygenase                           |                      |
| LP_2513                 | transcriptional regulator, Fis family             |                      |
| LP_2512                 | GntR family transcriptional regulator             |                      |
| LP_2509                 | AraC family transcriptional regulator             |                      |
| LP_2738                 | GntR family transcriptional regulator             |                      |
| LP_2132                 | DegA family transcriptional regulator             |                      |
| LP_1831                 | transcription regulator, HxlR family protein      |                      |
| LP_0389                 | transcription regulator                           |                      |
| LP_3140                 | LysR family transcriptional regulator             |                      |
| LP_1844                 | transcription regulator                           |                      |
| LP_1786                 | MFS transporter                                   |                      |
| LP_2511                 | multidrug ABC transporter ATP-binding protein     |                      |
| LP_2510                 | multidrug ABC transporter ATP-binding protein     |                      |
| LP_2618                 | MFS transporter                                   |                      |
| LP_1842                 | MFS transporter                                   |                      |
| LP_3137                 | sugar transporter                                 |                      |
| LP_2507 ( <i>lplB</i> ) | sugar ABC transporter permease                    | ABC transporter      |
| LP_2506 ( <i>lplC</i> ) | sugar ABC transporter permease                    |                      |
| LP_2505 ( <i>lplA</i> ) | ABC transporter substrate-binding protein         |                      |
| LP_2498 ( <i>msmX</i> ) | sugar ABC transporter ATP-binding protein         |                      |
| LP_2502 ( <i>yesM</i> ) | two-component sensor histidine kinase             | Two-Component System |
| LP_2501 ( <i>yesN</i> ) | DNA-binding response regulator                    |                      |
| LP_1168 ( <i>agrA</i> ) | DNA-binding response regulator                    |                      |
| LP_1081 ( <i>secB</i> ) | preprotein translocase subunit SecB               |                      |
| LP_1788 ( <i>bsh</i> )  | choloylglycine hydrolase                          |                      |
| LP_0388 ( <i>celB</i> ) | PTS cellbiose transporter subunit IIC             |                      |
| LP_1775 ( <i>bglF</i> ) | PTS beta-glucoside transporter subunit EIIBCA     |                      |
| LP_1792 ( <i>ulaA</i> ) | PTS ascorbate transporter subunit IIC             |                      |
| LP_1793 ( <i>ulaB</i> ) | pts, eiib                                         |                      |
| LP_2131 ( <i>manX</i> ) | PTS system sorbose subfamily IIB component        | Phosphotransferase   |
| LP_2130 ( <i>manY</i> ) | PTS N-acetylgalactosamine transporter subunit IIA | system               |
| LP_2129 ( <i>manZ</i> ) | N-acetylgalactosamine permease IID component      |                      |
| LP_2128 ( <i>manX</i> ) | PTS N-acetylglucosamine transporter subunit IIBC  |                      |
| LP_0382 ( <i>kdgK</i> ) | 2-keto-3-deoxygluconate kinase                    |                      |
| LP_1791 ( <i>talA</i> ) | fructose-6-phosphate aldolase                     |                      |
| LP_3136 ( <i>gdh</i> )  | glucose-1-dehydrogenase                           |                      |
| LP_2500 ( <i>scrK</i> ) | fructokinase                                      |                      |
| LP_1787 ( <i>malZ</i> ) | alpha-glucosidase                                 |                      |
| LP_1777 ( <i>bglA</i> ) | 6-phospho-beta-glucosidase                        |                      |
| LP_0385 ( <i>pyrC</i> ) | dihydroorotase                                    |                      |



|                 |                         |                                      |
|-----------------|-------------------------|--------------------------------------|
|                 | LP_0384 ( <i>selA</i> ) | L-seryl-tRNA selenium transferase    |
|                 | LP_2773                 | integral component of membrane       |
|                 | LP_1774 ( <i>bglA</i> ) | 6-phospho-beta-glucosidase           |
|                 | LP_1782                 | maltose phosphorylase                |
| Redundant genes | LP_2623                 | Integrase                            |
|                 | LP_3036                 | Integrase                            |
|                 | LP_3266                 | Integrase                            |
|                 | LP_2630                 | virulence protein                    |
|                 | LP_3230                 | virulence protein                    |
|                 | LP_2614                 | hypothetical protein                 |
|                 | LP_2462                 | alpha-galactosidase                  |
|                 | LP_1803                 | XRE family transcriptional regulator |
|                 | LP_3235                 | hypothetical protein                 |
|                 | LP_3037                 | DNA replication protein              |
|                 | LP_3213                 | phage tail protein                   |
|                 | LP_3214                 | endonuclease                         |
|                 | LP_3268                 | terminase                            |
|                 | LP_3117                 | DNA-packaging protein                |
|                 | LP_2270                 | hypothetical protein                 |
|                 | LP_0556                 | restriction endonuclease             |
|                 | LP_2613                 | cell surface protein                 |
|                 | LP_0805                 | hypothetical protein                 |
|                 | LP_0346                 | hypothetical protein                 |
|                 | LP_1638                 | hypothetical protein                 |
|                 | LP_1694                 | bacteriocin immunity protein         |
|                 | LP_0502                 | hypothetical protein                 |
|                 | LP_1176                 | hypothetical protein                 |

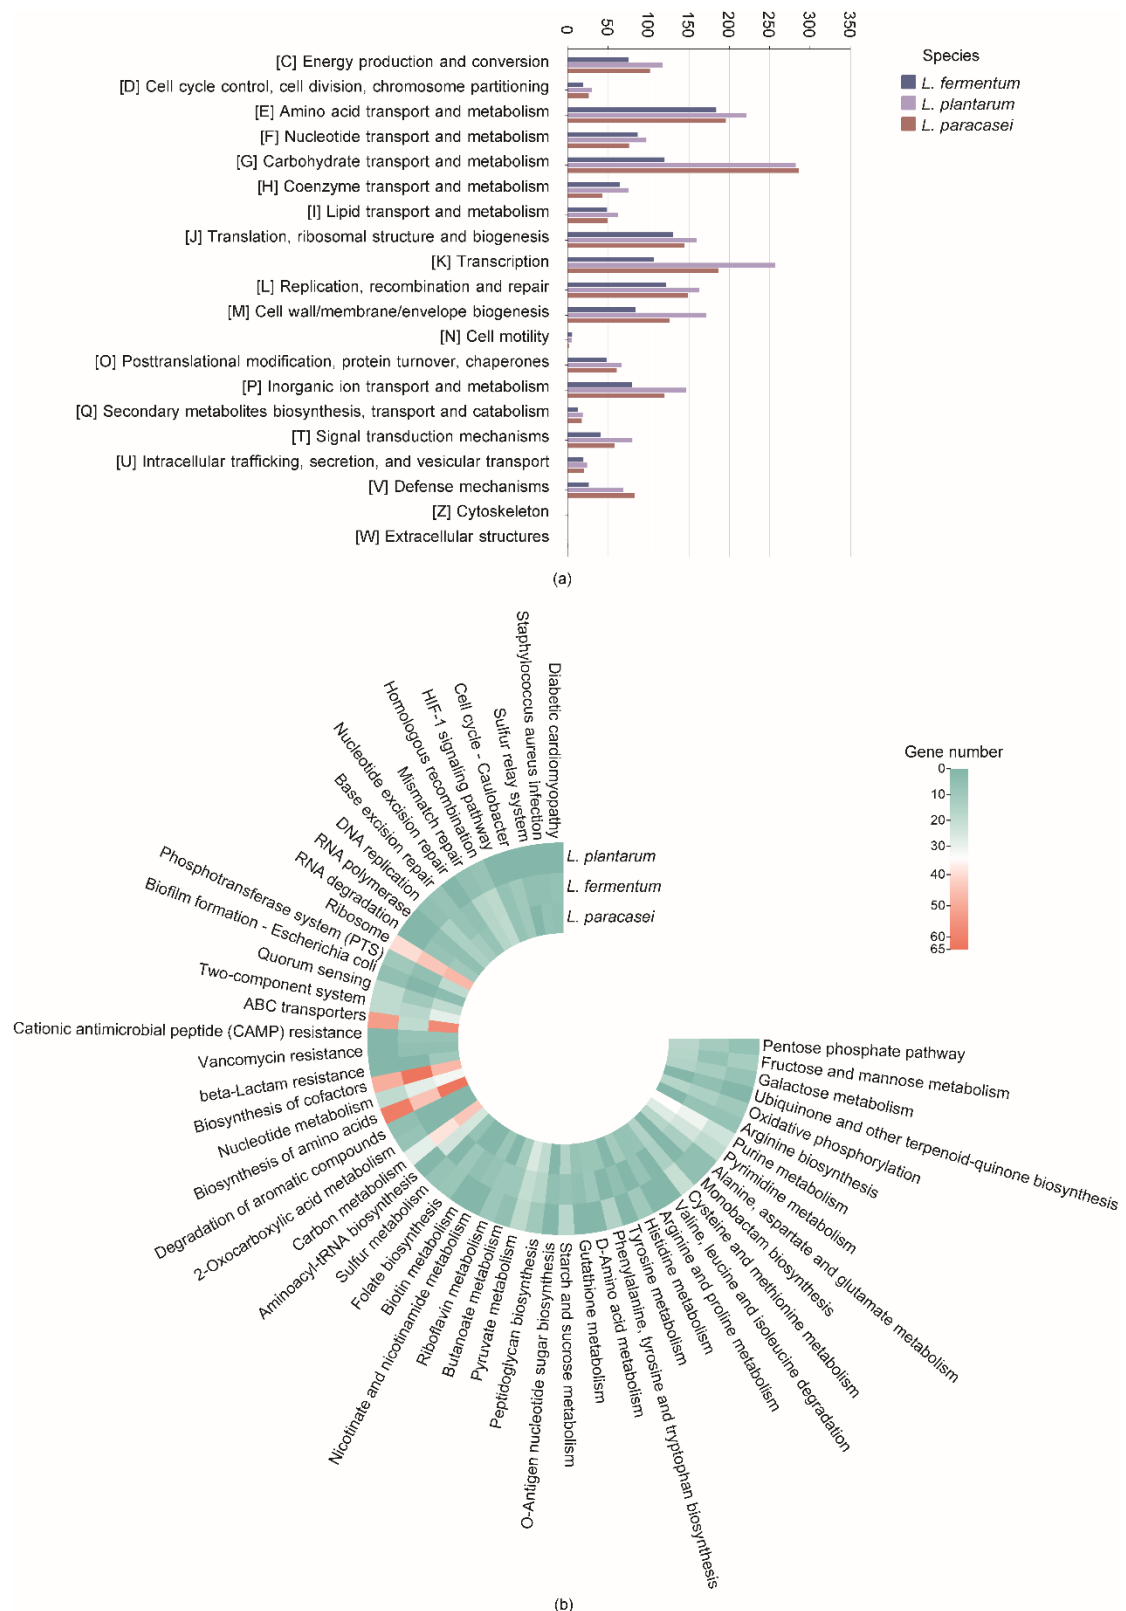

Figure. S1. In silico analysis of the potential metabolic pathways. (a) Composition of the COG function categories in *Lactobacilli*. (b) Metabolic pathway analysis of the homologous genes for different species through KEGG Mapper.
